# Supplementary material
Source: publisher site journal article supplement (https://www.dovepress.com/article/607823)
Supplement: Supplementary file 1 [file 607823%20Supplemental%20Material.docx]

**Supplemental Figure 1.** Stacked bar charts for categorical variables (gender and ASA classification) and kernel density plots for continuous variables (age, BMI, baseline eGFR, operative time, R.E.N.A.L. score, and clamp time) after IPTW matching


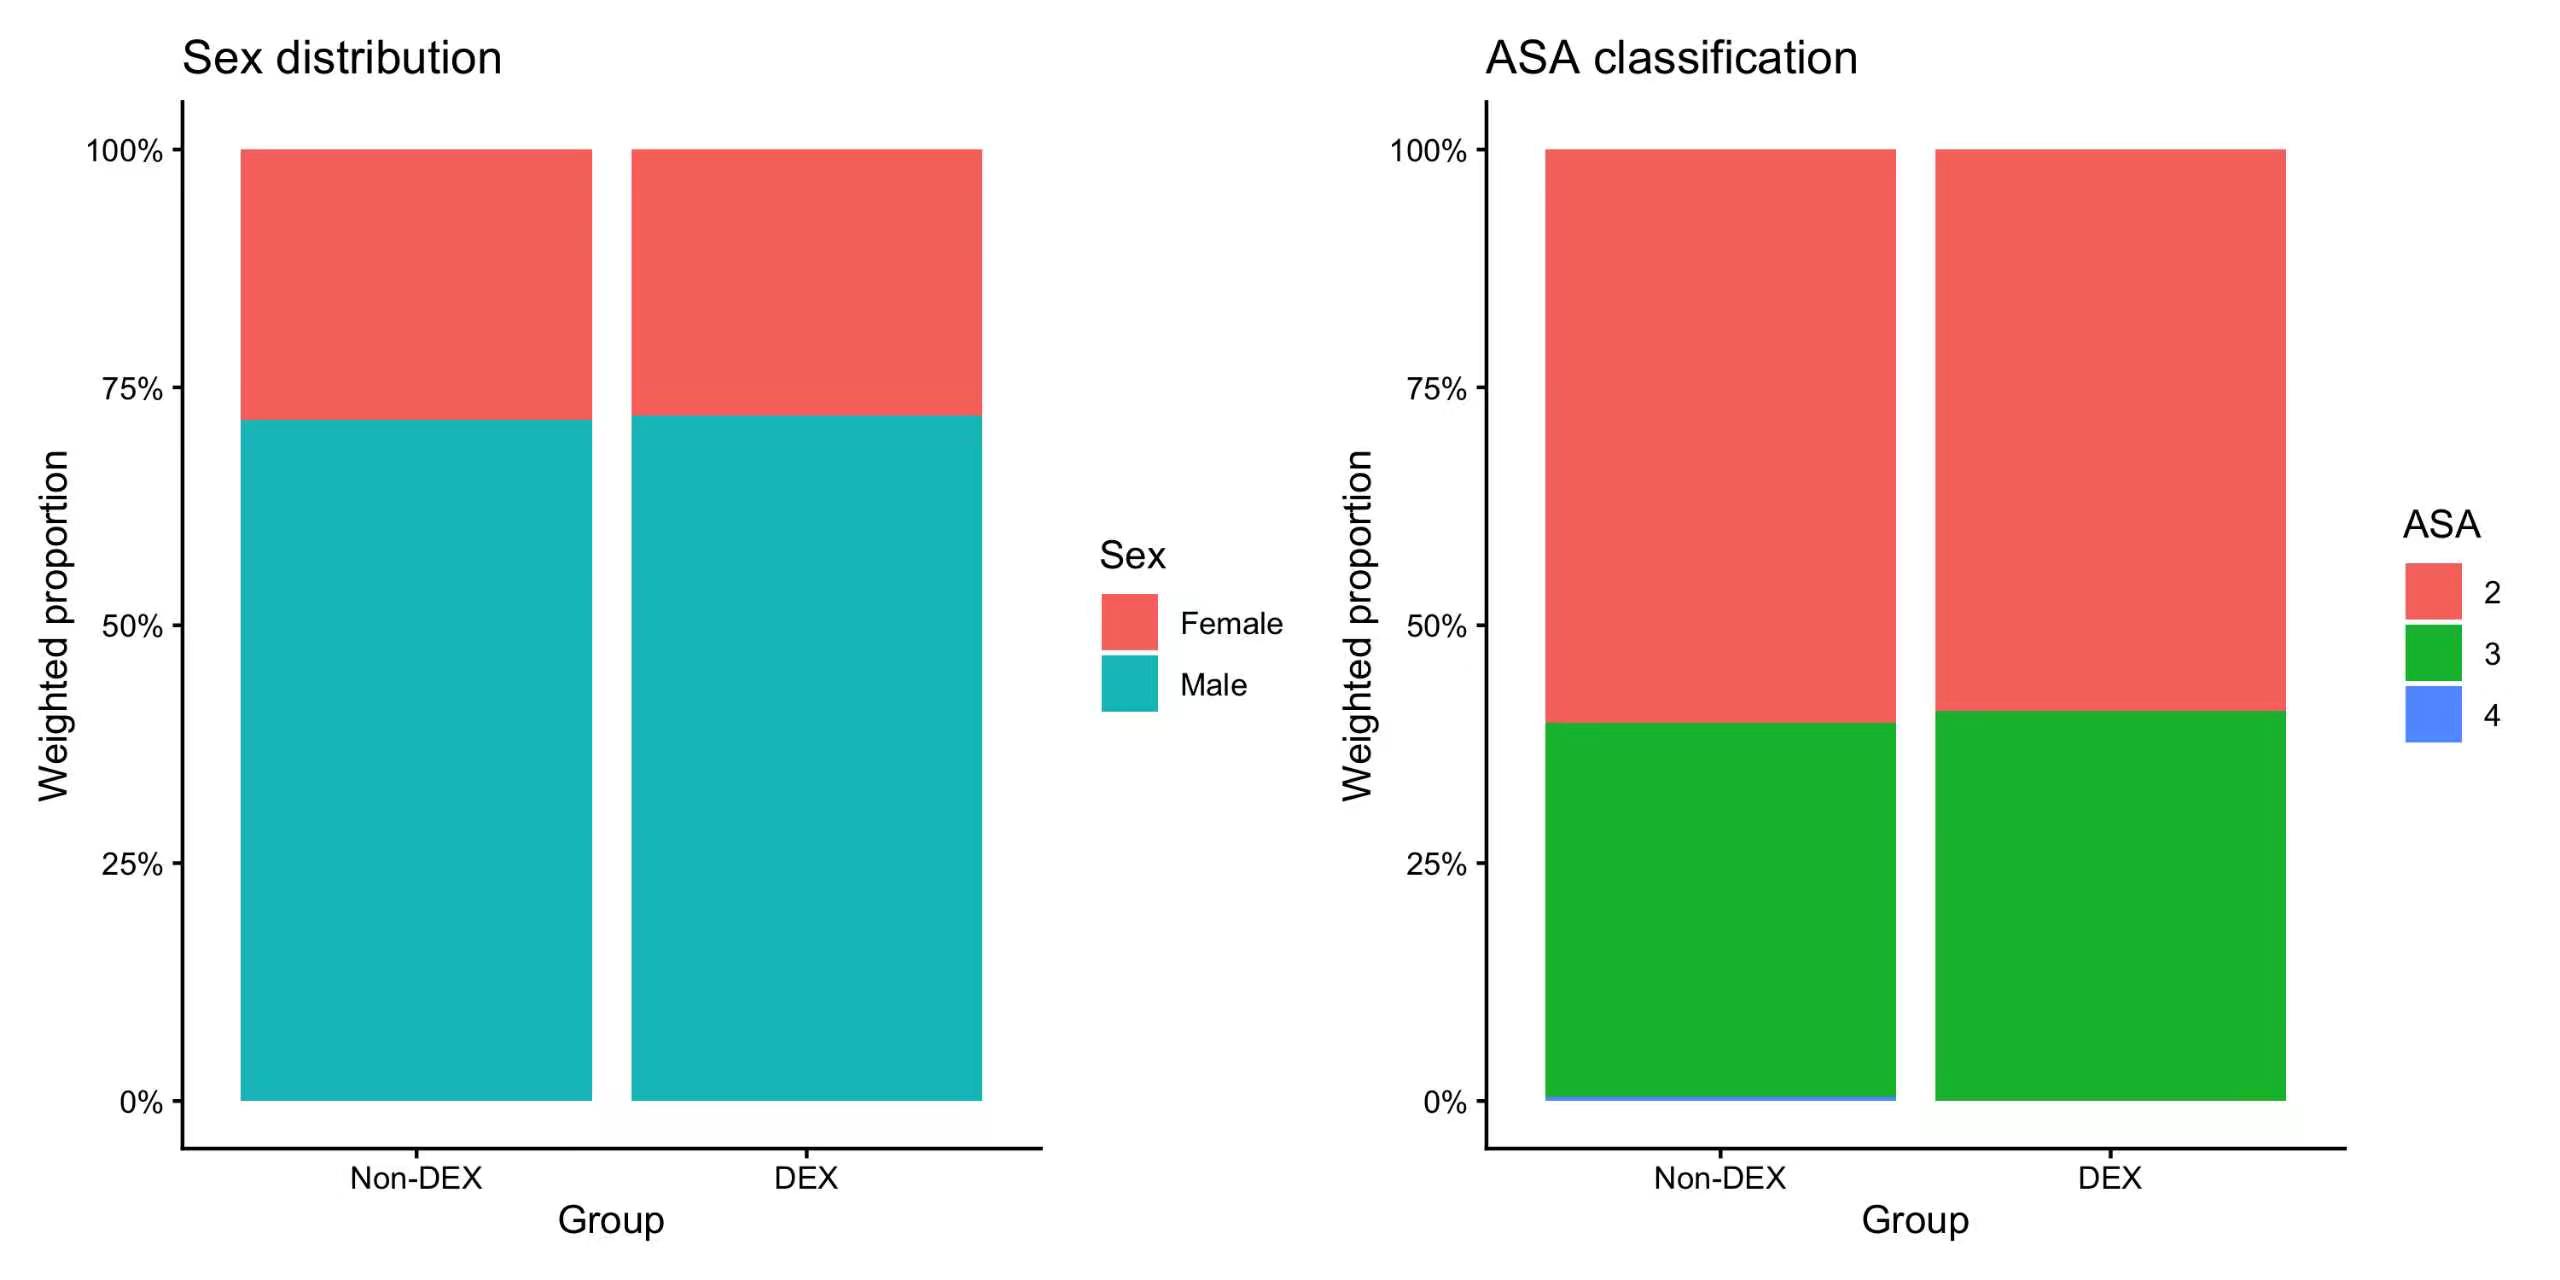

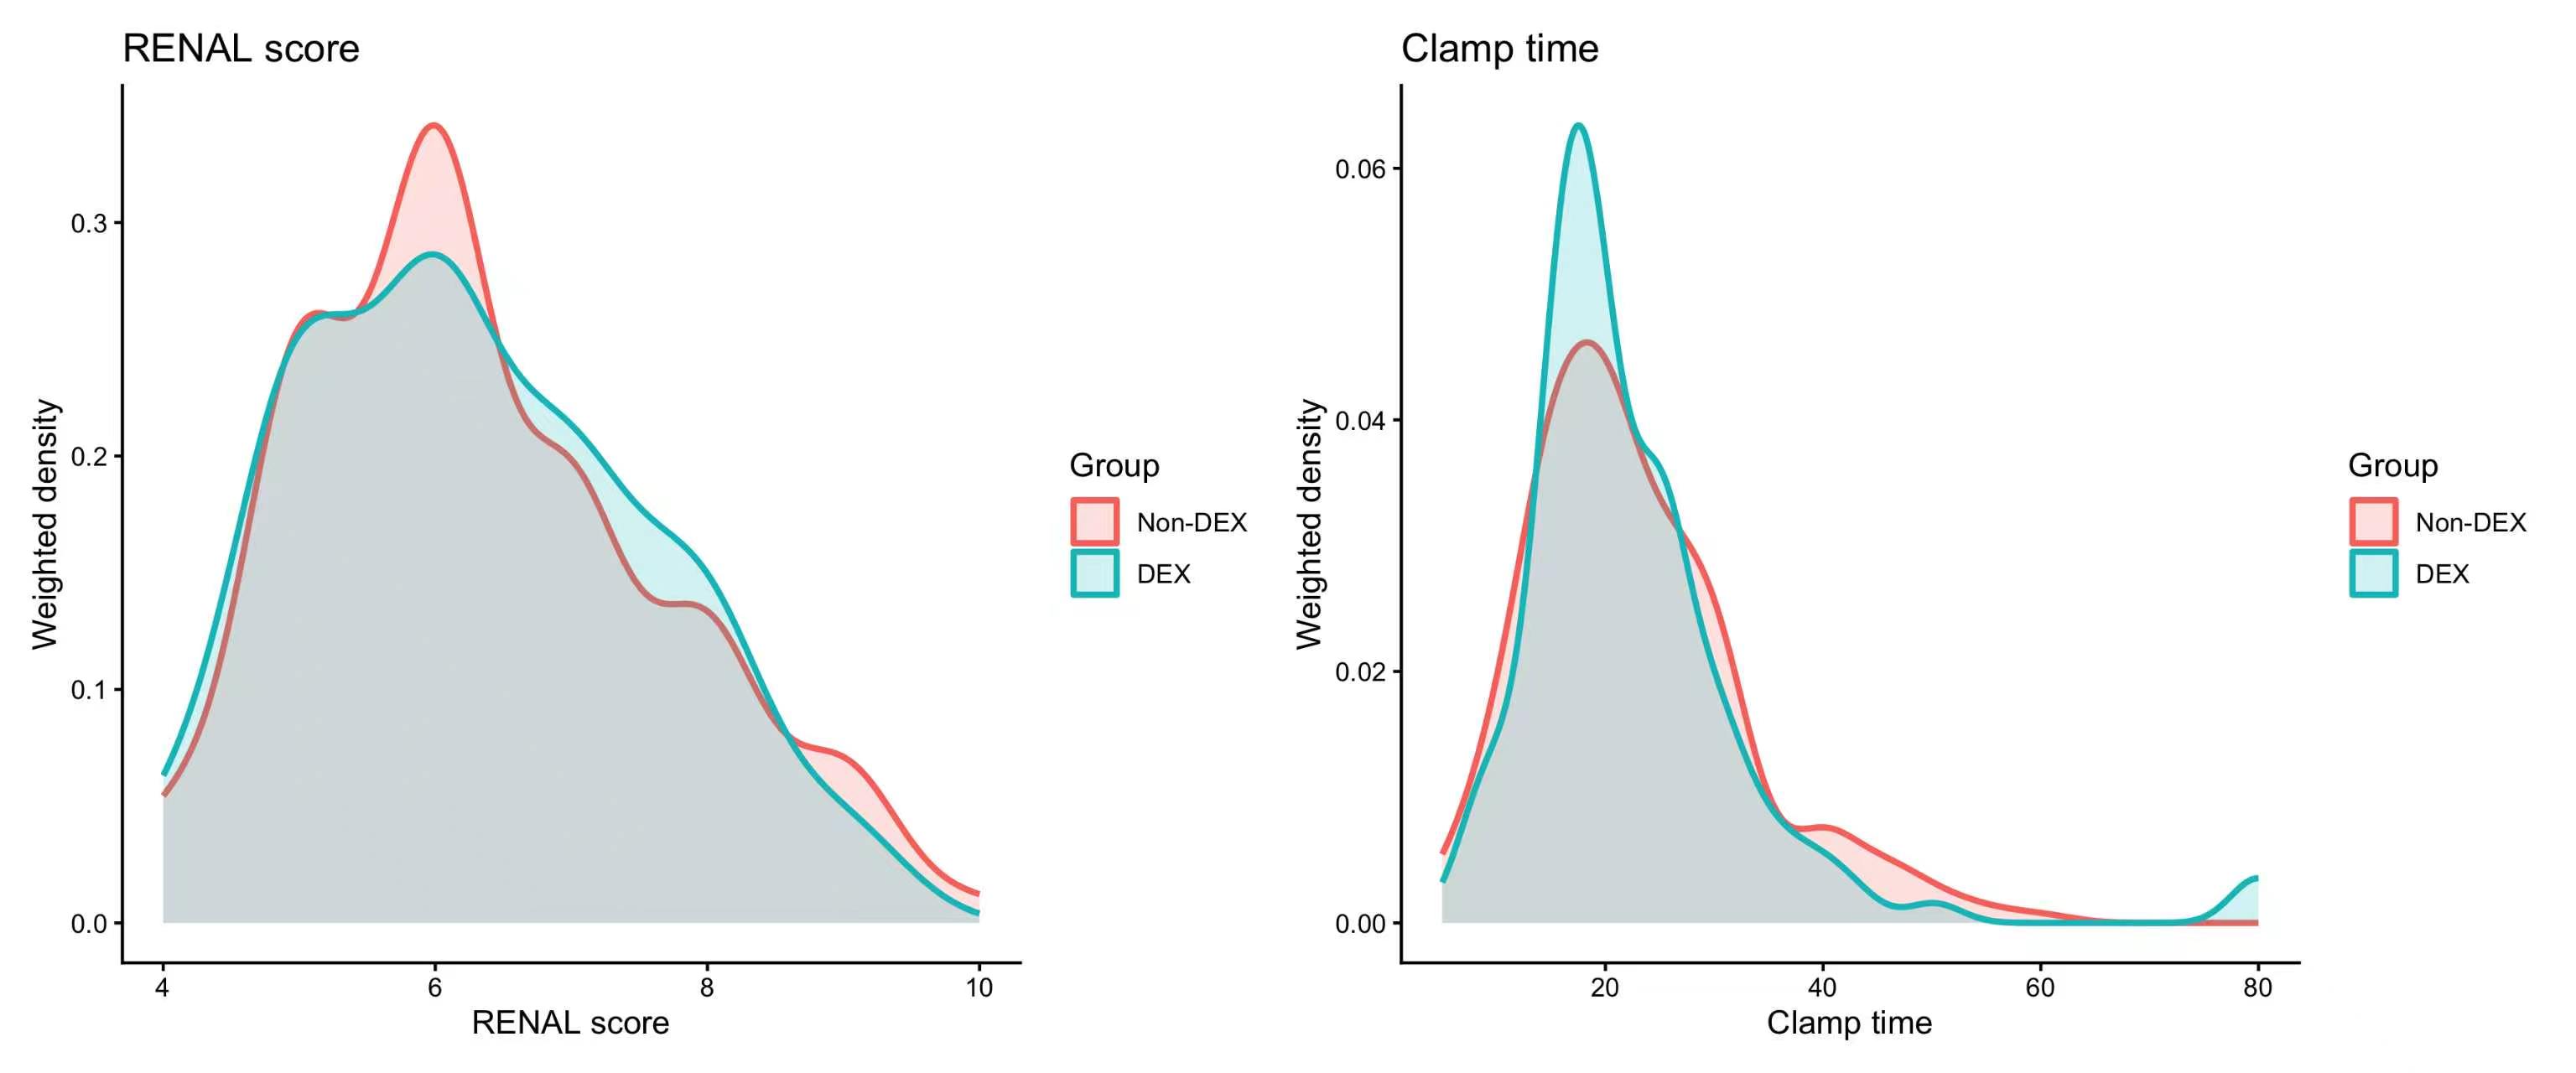

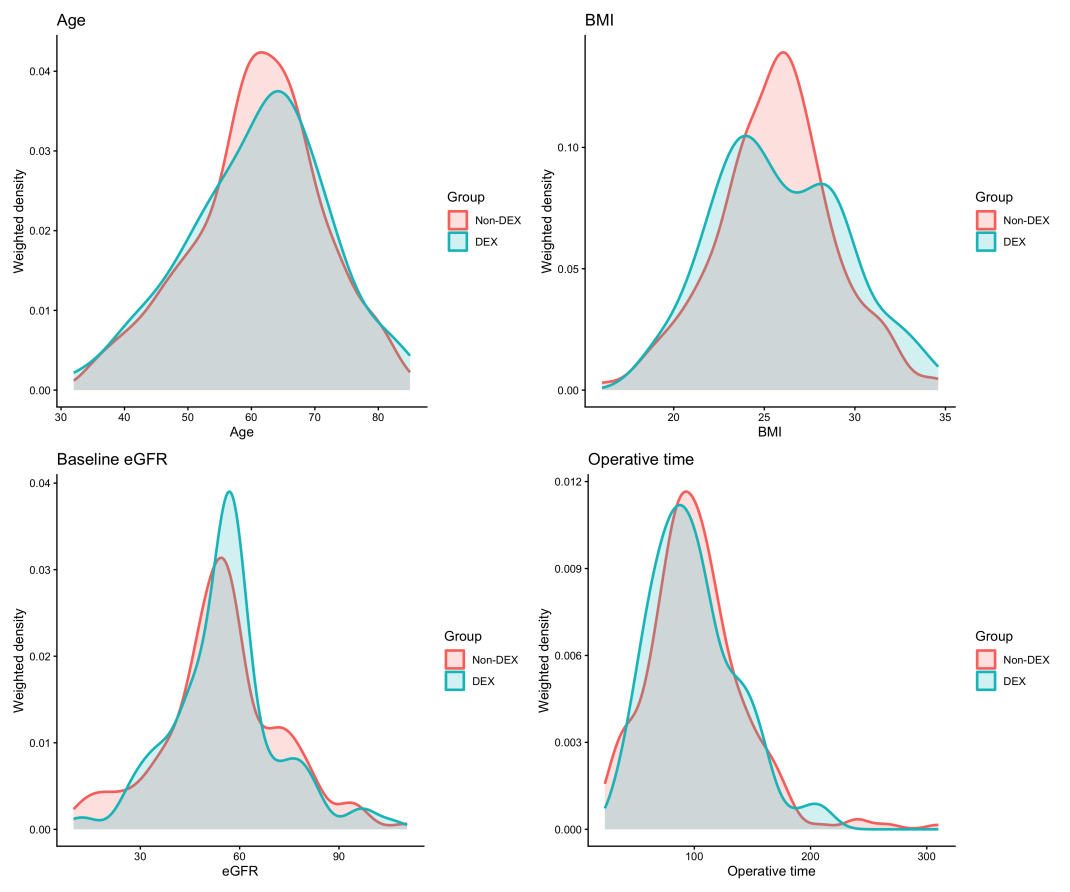


ASA, American Society of Anesthesiologists; BMI, body mass index; DEX, dexmedetomidine; eGFR, estimated glomerular ﬁltration rate; IPTW, Inverse Probability of Treatment Weighting.

**Supplemental Table 1. IPTW-Weighted Logistic Regression of Factors Associated With Postoperative AKI.**

|  | **Univariate** | | | **Multivariate** | | |
| --- | --- | --- | --- | --- | --- | --- |
| **OR** | **95%CI** | **P value** | **OR** | **95%CI** | **P value** |
| ASA classification | 1.314 | 0.780 to 2.216 | 0.304 | 1.326 | 0.784 to 2.243 | 0.292 |
| Dexmedetomidine use | 0.499 | 0.271 to 0.921 | 0.026 | 0.497 | 0.269 to 0.918 | 0.026 |

ASA, American Society of Anesthesiologists; CI, confidence interval; IPTW, Inverse Probability of Treatment Weighting; OR, odds ratio.
